# Supplementary material for: Wide range of metabolic adaptations to the acquisition of the Calvin cycle revealed by comparison of microbial genomes
Source: PubMed Central journal article supplement (PMC7895386; doi:10.1371/journal.pcbi.1008742), 2021-02-08
Supplement: pcbi.1008742.s002.pdf [file pcbi.1008742.s002.pdf]

**S1 Table. Random sample of 50 CBB-positive genomes with literature references supporting or opposing Calvin cycle utilization and autotrophy.**

| Accession          | Species                                         | Comment                                                              | CBB | Ref.      |
|--------------------|-------------------------------------------------|----------------------------------------------------------------------|-----|-----------|
| GB_GCA_003137095.1 | Bog-1198 sp003137095                            | No information                                                       | NA  | NA        |
| RS_GCF_000698555.1 | <i>Caballeronia grimmiae</i>                    | Isolated from moss                                                   | 0   | [1,2]     |
| GB_GCA_003244105.1 | <i>Eremiobacter</i> sp003244105                 | Calvin cycle observed but not confirmed operational                  | 1   | [3]       |
| RS_GCF_003057965.1 | <i>Thermodesulfobium acidiphilum</i>            | Chemolithoautotrophic                                                | 1   | [4]       |
| GB_GCA_002726415.1 | GCA-2726415 sp002726415 (Acidiferrobacteraceae) | Chemolithoautotrophic                                                | 1   | [5]       |
| RS_GCF_000012425.1 | <i>Dechloromonas aromatica</i>                  | Calvin cycle observed but not confirmed operational                  | 1   | [6]       |
| RS_GCF_000612825.1 | <i>Mycolicibacterium mageritense</i>            | Human pathogen; predominantly environmental                          | 0   | [7,8]     |
| RS_GCF_000502875.1 | <i>Mesorhizobium</i> sp000502875                | No information                                                       | NA  | NA        |
| GB_GCA_002366795.1 | UBA3069 sp002366795 (Rhodobacteraceae)          | Phototrophic; CBB-positive or -negative                              | 1   | [9,10]    |
| GB_GCA_003165655.1 | Palsa-465 sp003165655                           | No information                                                       | NA  | NA        |
| GB_GCA_900105125.1 | <i>Bradyrhizobium canariense_A</i>              | Nodulates genistoid legumes of Canary Islands                        | 0   | [11]      |
| RS_GCF_000227215.1 | <i>Acidithiobacillus thiooxidans</i>            | Sulfur oxidizer that uses Calvin cycle                               | 1   | [12]      |
| RS_GCF_001612825.1 | <i>Nocardia caishijiensis</i>                   | Endophyte                                                            | 0   | [13]      |
| RS_GCF_002903155.1 | <i>Sulfobacillus</i> sp002903155                | Sulfur oxidizer that uses Calvin cycle                               | 1   | [14]      |
| RS_GCF_000297055.2 | <i>Sulfuricella denitrificans</i>               | Sulfur oxidizer that uses Calvin cycle                               | 1   | [15]      |
| RS_GCF_001558155.1 | <i>Pseudoruegeria_C sabulilitoris</i>           | Isolated from seashore sand; Phototrophic; CBB-positive or -negative | 1   | [9,10,16] |
| RS_GCF_000196675.1 | <i>Pseudonocardia dioxanivorans</i>             | Chemolithoautotrophic; Uses Calvin cycle                             | 1   | [17,18]   |
| RS_GCF_000701585.1 | <i>Acidiphilium angustum</i>                    | Quasiphotosynthetic/Photoheterotrophic                               | 0   | [19,20]   |
| RS_GCF_000227665.2 | <i>Thiomicrospira aerophila</i>                 | Sulfur-oxidizing chemolithoautotroph with Rubisco                    | 1   | [21]      |
| GB_GCA_002083395.1 | <i>Nitrosomonas</i> sp002083395                 | Ammonia-oxidizing bacterium that uses Calvin cycle                   | 1   | [22]      |
| RS_GCF_001613365.1 | <i>Nocardia xishanensis</i>                     | Isolated from soil                                                   | 0   | [23]      |
| GB_GCA_003221005.1 | AG25 sp003221005                                | No information                                                       | NA  | NA        |
| GB_GCA_003138975.1 | <i>Sulfotelmato bacter</i> sp003138975          | Potentially sulfur- and hydrogen-oxidizing                           | 1   | [24]      |
| RS_GCF_900104745.1 | <i>Actinopolymorpha singaporensis</i>           | Isolated from tropical rainforest                                    | 0   | [25]      |
| RS_GCF_001458355.1 | <i>Thalassobius gelatinovor</i>                 | Chemo-organotroph; Phototrophic; CBB-positive or -negative           | 1   | [9,10,26] |
| UBA9297            | <i>Methanothrix_A</i> sp9297u                   | Rubisco-mediated CO <sub>2</sub> reduction                           | 1   | [27]      |
| RS_GCF_900155475.1 | <i>Methylomagnum ishizawai</i>                  | RuMP and RuBP (Calvin cycle) pathways active                         | 1   | [28]      |
| RS_GCF_000013085.1 | <i>Rhodospirillum rubrum</i>                    | Photoautotroph that uses the Calvin cycle                            | 1   | [9]       |
| RS_GCF_900104845.1 | <i>Paraburkholderia_B caballeronis</i>          | Tomato-associated                                                    | 0   | [29]      |

|                    |                                                     |                                                                    |    |           |
|--------------------|-----------------------------------------------------|--------------------------------------------------------------------|----|-----------|
| RS_GCF_001583505.1 | <i>Marichromatium gracile</i>                       | Sulfur-oxidation and denitrification                               | 1  | [30]      |
| RS_GCF_003053725.1 | <i>Rhodovulum kholense</i>                          | Photolithoautotrophic; Phototrophic; CBB-<br>positive or -negative | 1  | [9,10,31] |
| GB_GCA_002695745.2 | GCA-002705045<br>sp002695745<br>(Rhodobacteraceae)  | Phototrophic; CBB-positive or -negative                            | 1  | [9,10]    |
| GB_GCA_001512375.1 | <i>Methanoculleus<br/>thermohydrogenotrophicum</i>  | Hydrogenotrophic methanogen                                        | 0  | [32]      |
| GB_GCA_003104975.1 | <i>Methylomirabilis<br/>sp003104975</i>             | Uses Calvin cycle                                                  | 1  | [33]      |
| GB_GCA_001447805.1 | <i>Tenderia electrophaga</i>                        | Electroautotroph that uses the Calvin cycle                        | 1  | [34,35]   |
| RS_GCF_900129505.1 | <i>Bradyrhizobium<br/>erythrophlei_D</i>            | Isolated from ironwood nodules                                     | 0  | [36]      |
| RS_GCF_000787695.1 | <i>Paracoccus</i> sp000787695<br>(Rhodobacteraceae) | Phototrophic; CBB-positive or -negative                            | 1  | [9,10,37] |
| RS_GCF_001295865.1 | <i>Rubrivivax</i> sp001295865                       | Chemolithoautotrophic; Uses Calvin cycle                           | 1  | [38]      |
| RS_GCF_000304355.2 | <i>Methanoculleus bourgensis</i>                    | Hydrogenotrophic methanogen                                        | 0  | [39]      |
| GB_GCA_003233235.1 | SZUA-26 sp003233235<br>(Mariprofundaceae)           | Iron-oxidizing chemolithoautotroph; Has<br>Calvin cycle genes      | 1  | [40]      |
| GB_GCA_003446655.1 | <i>Thauera</i> sp003446655                          | Chemolithoautotrophic                                              | 1  | [41]      |
| GB_GCA_002839575.1 | <i>Methanoculleus<br/>sp002839575</i>               | Hydrogenotrophic methanogen                                        | 0  | [32,39]   |
| GB_GCA_003160215.1 | Bog-257 sp003160215                                 | No information                                                     | NA | NA        |
| GB_GCA_001899775.1 | <i>Thiobacillus</i> sp001899775                     | Chemolithoautotrophic; Uses Calvin cycle                           | 1  | [42,43]   |
| GB_GCA_003138855.1 | Bog-756 sp003138855                                 | No information                                                     | NA | NA        |
| GB_GCA_002256995.1 | <i>Thiobacillus</i> sp002256995                     | Chemolithoautotrophic; Uses Calvin cycle                           | 1  | [42,43]   |
| GB_GCA_003157035.1 | Fen-999 sp003157035<br>(Rhodocyclaceae)             | Some family members are<br>photoautotrophic                        | 1  | [21]      |
| GB_GCA_003228405.1 | SZUA-229 sp003228405                                | No information                                                     | NA | NA        |
| RS_GCF_000243255.1 | <i>Methanoplanus limicola</i>                       | Methanogen                                                         | 0  | [44]      |
| GB_GCA_002256785.1 | <i>Thiobacillus</i> sp002256785                     | Chemolithoautotrophic; Uses Calvin cycle                           | 1  | [42,43]   |

The columns contain GTDB accession ID ('Accession'), species name from GTDB ('Species'; family name is given within parentheses if used for conclusion), a comment regarding Calvin cycle utilization and autotrophy or other acquired information ('Comment'), statement about Calvin cycle confirmation ('CBB'; 1 if likely confirmed, 0 if not likely confirmed, NA if there was no information), and references for the comment ('Ref.'). There was no information available for seven genomes. For the remaining 43 genomes, 30 (70%) appeared to be likely Calvin-cycle positive genomes, but only one (2%) genome appeared unlikely to be Calvin-cycle positive given its status as a human pathogen (*Mycolicibacterium mageritense*).

## References

1. Peeters C, Meier-Kolthoff JP, Verheyde B, De Brandt E, Cooper VS, Vandamme P. Phylogenomic Study of Burkholderia glathei-like Organisms, Proposal of 13 Novel Burkholderia Species and Emended Descriptions of Burkholderia sordidicola, Burkholderia zhejiangensis, and Burkholderia grimmiae. *Front Microbiol.* 2016;7. doi:10.3389/fmicb.2016.00877
2. Tian Y, Kong BH, Liu SL, Li CL, Yu R, Liu L, et al. Burkholderia grimmiae sp. nov., isolated from a xerophilous moss (*Grimmia montana*). *Int J Syst Evol Microbiol.* 2013;63: 2108–2113. doi:10.1099/ijs.0.045492-0
3. Ward LM, Cardona T, Holland-Moritz H. Evolutionary Implications of Anoxygenic Phototrophy in the Bacterial Phylum Candidatus Eremiobacterota (WPS-2). *Front Microbiol.* 2019;10. doi:10.3389/fmicb.2019.01658
4. Frolov EN, Kublanov IV, Toshchakov SV, Samarov NI, Novikov AA, Lebedinsky AV, et al. *Thermodesulfobium acidiphilum* sp. nov., a thermoacidophilic, sulfate-reducing, chemoautotrophic bacterium from a thermal site. *Int J Syst Evol Microbiol.* 2017;67: 1482–1485. doi:10.1099/ijsem.0.001745
5. Issotta F, Moya-Beltrán A, Mena C, Covarrubias PC, Thyssen C, Bellenberg S, et al. Insights into the biology of acidophilic members of the Acidiferrobacteraceae family derived from comparative genomic analyses. *Res Microbiol.* 2018;169: 608–617. doi:10.1016/j.resmic.2018.08.001
6. Salinero KK, Keller K, Feil WS, Feil H, Trong S, Di Bartolo G, et al. Metabolic analysis of the soil microbe *Dechloromonas aromatica* str. RCB: indications of a surprisingly complex life-style and cryptic anaerobic pathways for aromatic degradation. *BMC Genomics.* 2009;10: 351. doi:10.1186/1471-2164-10-351
7. Wallace RJ, Brown-Elliott BA, Hall L, Roberts G, Wilson RW, Mann LB, et al. Clinical and Laboratory Features of *Mycobacterium mageritense*. *J Clin Microbiol.* 2002;40: 2930–2935. doi:10.1128/JCM.40.8.2930-2935.2002
8. Gupta RS, Lo B, Son J. Phylogenomics and Comparative Genomic Studies Robustly Support Division of the Genus *Mycobacterium* into an Emended Genus *Mycobacterium* and Four Novel Genera. *Front Microbiol.* 2018;9. doi:10.3389/fmicb.2018.00067
9. Gordon GC, McKinlay JB. Calvin Cycle Mutants of Photoheterotrophic Purple Nonsulfur Bacteria Fail To Grow Due to an Electron Imbalance Rather than Toxic Metabolite Accumulation. *J Bacteriol.* 2014;196: 1231–1237. doi:10.1128/JB.01299-13
10. Brinkmann H, Göker M, Koblížek M, Wagner-Döbler I, Petersen J. Horizontal operon transfer, plasmids, and the evolution of photosynthesis in Rhodobacteraceae. *ISME J.* 2018;12: 1994–2010. doi:10.1038/s41396-018-0150-9
11. Vinuesa P, León-Barrios M, Silva C, Willems A, Jarabo-Lorenzo A, Pérez-Galdona R, et al. *Bradyrhizobium canariense* sp. nov., an acid-tolerant endosymbiont that nodulates endemic

- genistoid legumes (Papilionoideae: Genisteeae) from the Canary Islands, along with *Bradyrhizobium japonicum* bv. *genistearum*, *Bradyrhizobium* genospecies alpha and *Bradyrhizobium* genospecies beta. *Int J Syst Evol Microbiol.* 2005;55: 569–575. doi:10.1099/ijs.0.63292-0
12. Yang L, Zhao D, Yang J, Wang W, Chen P, Zhang S, et al. *Acidithiobacillus thiooxidans* and its potential application. *Appl Microbiol Biotechnol.* 2019;103: 7819–7833. doi:10.1007/s00253-019-10098-5
  13. Tanvir R, Sajid I, Hasnain S, Kulik A, Grond S. Rare actinomycetes *Nocardia caishijiensis* and *Pseudonocardia carboxydivorans* as endophytes, their bioactivity and metabolites evaluation. *Microbiol Res.* 2016;185: 22–35. doi:10.1016/j.micres.2016.01.003
  14. Justice NB, Norman A, Brown CT, Singh A, Thomas BC, Banfield JF. Comparison of environmental and isolate *Sulfobacillus* genomes reveals diverse carbon, sulfur, nitrogen, and hydrogen metabolisms. *BMC Genomics.* 2014;15: 1107. doi:10.1186/1471-2164-15-1107
  15. Kojima H, Fukui M. *Sulfuricella denitrificans* gen. nov., sp. nov., a sulfur-oxidizing autotroph isolated from a freshwater lake. *Int J Syst Evol Microbiol.* 2010;60: 2862–2866. doi:10.1099/ijs.0.016980-0
  16. Park S, Jung Y-T, Won S-M, Yoon J-H. *Pseudoruegeria sabulilitoris* sp. nov., isolated from seashore sand. *Int J Syst Evol Microbiol.* 2014;64: 3276–3281. doi:10.1099/ijs.0.066258-0
  17. Mahendra S, Alvarez-Cohen L. *Pseudonocardia dioxanivorans* sp. nov., a novel actinomycete that grows on 1,4-dioxane. *Int J Syst Evol Microbiol.* 2005;55: 593–598. doi:10.1099/ijs.0.63085-0
  18. Sales CM, Mahendra S, Grostern A, Parales RE, Goodwin LA, Woyke T, et al. Genome Sequence of the 1,4-Dioxane-Degrading *Pseudonocardia dioxanivorans* Strain CB1190. *J Bacteriol.* 2011;193: 4549–4550. doi:10.1128/JB.00415-11
  19. Kishimoto N, Fukaya F, Inagaki K, Sugio T, Tanaka H, Tano T. Distribution of bacteriochlorophyll a among aerobic and acidophilic bacteria and light-enhanced CO<sub>2</sub>-incorporation in *Acidiphilium rubrum*. *FEMS Microbiol Ecol.* 1995;16: 291–296. doi:10.1111/j.1574-6941.1995.tb00293.x
  20. Wichlacz PL, Unz RF, Langworthy TA. *Acidiphilium angustum* sp. nov., *Acidiphilium facilis* sp. nov., and *Acidiphilium rubrum* sp. nov.: Acidophilic Heterotrophic Bacteria Isolated from Acidic Coal Mine Drainage. *Int J Syst Evol Microbiol.* 1986;36: 197–201. doi:10.1099/00207713-36-2-197
  21. Boden R, Scott KM, Williams J, Russel S, Antonen K, Rae AW, et al. An evaluation of *Thiomicrospira*, *Hydrogenovibrio* and *Thioalkalimicrobium*: reclassification of four species of *Thiomicrospira* to each *Thiomicrospira* gen. nov. and *Hydrogenovibrio*, and reclassification of all four species of *Thioalkalimicrobium* to *Thiomicrospira*. *Int J Syst Evol Microbiol.* 2017;67: 1140–1151. doi:10.1099/ijsem.0.001855
  22. Chain P, Lamerdin J, Larimer F, Regala W, Lao V, Land M, et al. Complete Genome Sequence of the Ammonia-Oxidizing Bacterium and Obligate Chemolithoautotroph *Nitrosomonas europaea*. *J Bacteriol.* 2003;185: 2759–2773. doi:10.1128/JB.185.9.2759-2773.2003

23. Zhang J, Liu Z, Goodfellow M. *Nocardia xishanensis* sp. nov., a novel actinomycete isolated from soil. *Int J Syst Evol Microbiol.* 2004;54: 2301–2305. doi:10.1099/ijms.0.63133-0
24. Hausmann B, Pelikan C, Herbold CW, Köstlbacher S, Albertsen M, Eichorst SA, et al. Peatland Acidobacteria with a dissimilatory sulfur metabolism. *ISME J.* 2018;12: 1729–1742. doi:10.1038/s41396-018-0077-1
25. Wang YM, Zhang ZS, Xu XL, Ruan JS, Wang Y. *Actinopolymorpha singaporensis* gen. nov., sp. nov., a novel actinomycete from the tropical rainforest of Singapore. *Int J Syst Evol Microbiol.* 2001;51: 467–473. doi:10.1099/00207713-51-2-467
26. Arahal DR, Macián MC, Garay E, Pujalte MJ. *Thalassobius mediterraneus* gen. nov., sp. nov., and reclassification of *Ruegeria gelatinovorans* as *Thalassobius gelatinovorans* comb. nov. *Int J Syst Evol Microbiol.* 2005;55: 2371–2376. doi:10.1099/ijms.0.63842-0
27. Yang P, Tan G-YA, Aslam M, Kim J, Lee P-H. Metatranscriptomic evidence for classical and RuBisCO-mediated CO<sub>2</sub> reduction to methane facilitated by direct interspecies electron transfer in a methanogenic system. *Sci Rep.* 2019;9: 4116. doi:10.1038/s41598-019-40830-0
28. Khalifa A, Lee CG, Ogiso T, Ueno C, Dianou D, Demachi T, et al. *Methylomagnum ishizawai* gen. nov., sp. nov., a mesophilic type I methanotroph isolated from rice rhizosphere. *Int J Syst Evol Microbiol.* 2015;65: 3527–3534. doi:10.1099/ijsem.0.000451
29. Rojas-Rojas FU, Tapia-García EY, Maymon M, Humm E, Huntemann M, Clum A, et al. Draft genome of *Paraburkholderia caballeronis* TNe-841T, a free-living, nitrogen-fixing, tomato plant-associated bacterium. *Stand Genomic Sci.* 2017;12: 80. doi:10.1186/s40793-017-0294-7
30. Zhu B, Zhang X, Zhao C, Chen S, Yang S. Comparative genome analysis of marine purple sulfur bacterium *Marichromatium gracile* YL28 reveals the diverse nitrogen cycle mechanisms and habitat-specific traits. *Sci Rep.* 2018;8: 17803. doi:10.1038/s41598-018-36160-2
31. Kumar PA, Aparna P, Srinivas TNR, Sasikala Ch, Ramana ChV. *Rhodovulum kholense* sp. nov. *Int J Syst Evol Microbiol.* 2008;58: 1723–1726. doi:10.1099/ijms.0.65620-0
32. Kougias PG, Campanaro S, Treu L, Zhu X, Angelidaki I. A novel archaeal species belonging to *Methanoculleus* genus identified via de-novo assembly and metagenomic binning process in biogas reactors. *Anaerobe.* 2017;46: 23–32. doi:10.1016/j.anaerobe.2017.02.009
33. Versantvoort W, Guerrero-Cruz S, Speth DR, Frank J, Gambelli L, Cremers G, et al. Comparative Genomics of *Candidatus Methylomirabilis* Species and Description of *Ca. Methylomirabilis Lanthanidiphila*. *Front Microbiol.* 2018;9. doi:10.3389/fmicb.2018.01672
34. Eddie BJ, Wang Z, Hervey WJ, Leary DH, Malanoski AP, Tender LM, et al. Metatranscriptomics Supports the Mechanism for Biocathode Electroautotrophy by “*Candidatus Tenderia electrophaga*.” *mSystems.* 2017;2. doi:10.1128/mSystems.00002-17
35. Eddie BJ, Wang Z, Malanoski AP, Hall RJ, Oh SD, Heiner C, et al. ‘*Candidatus Tenderia electrophaga*’, an uncultivated electroautotroph from a biocathode enrichment. *Int J Syst Evol Microbiol.* 2016;66: 2178–2185. doi:10.1099/ijsem.0.001006

36. Yao Y, Sui XH, Zhang XX, Wang ET, Chen WX. *Bradyrhizobium erythrophlei* sp. nov. and *Bradyrhizobium ferriligni* sp. nov., isolated from effective nodules of *Erythrophleum fordii*. *Int J Syst Evol Microbiol.* 2015;65: 1831–1837. doi:10.1099/ij.s.0.000183
37. Baker SC, Ferguson SJ, Ludwig B, Page MD, Richter O-MH, Spanning RJM van. Molecular Genetics of the Genus *Paracoccus*: Metabolically Versatile Bacteria with Bioenergetic Flexibility. *Microbiol Mol Biol Rev.* 1998;62: 1046–1078. doi:10.1128/MMBR.62.4.1046-1078.1998
38. Wawrousek K, Noble S, Korlach J, Chen J, Eckert C, Yu J, et al. Genome Annotation Provides Insight into Carbon Monoxide and Hydrogen Metabolism in *Rubrivivax gelatinosus*. *PLOS ONE.* 2014;9: e114551. doi:10.1371/journal.pone.0114551
39. Maus I, Wibberg D, Stantscheff R, Eikmeyer F-G, Seffner A, Boelter J, et al. Complete Genome Sequence of the Hydrogenotrophic, Methanogenic Archaeon *Methanoculleus bourgensis* Strain MS2T, Isolated from a Sewage Sludge Digester. *J Bacteriol.* 2012;194: 5487–5488. doi:10.1128/JB.01292-12
40. Emerson D, Rentz JA, Lilburn TG, Davis RE, Aldrich H, Chan C, et al. A Novel Lineage of Proteobacteria Involved in Formation of Marine Fe-Oxidizing Microbial Mat Communities. *PLOS ONE.* 2007;2: e667. doi:10.1371/journal.pone.0000667
41. Jiang K, Sanseverino J, Chauhan A, Lucas S, Copeland A, Lapidus A, et al. Complete genome sequence of *Thauera aminoaromatica* strain MZ1T. *Stand Genomic Sci.* 2012;6: 325. doi:10.4056/sigs.2696029
42. Gale NL, Beck JV. Evidence for the Calvin Cycle and Hexose Monophosphate Pathway in *Thiobacillus ferrooxidans*. *J Bacteriol.* 1967;94: 1052–1059.
43. Nemati M, Harrison STL, Hansford GS, Webb C. Biological oxidation of ferrous sulphate by *Thiobacillus ferrooxidans*: a review on the kinetic aspects. *Biochem Eng J.* 1998;1: 171–190. doi:10.1016/S1369-703X(98)00006-0
44. Göker M, Lu M, Fiebig A, Nolan M, Lapidus A, Tice H, et al. Genome sequence of the mud-dwelling archaeon *Methanoplanus limicola* type strain (DSM 2279T), reclassification of *Methanoplanus petrolearius* as *Methanolacinia petrolearia* and emended descriptions of the genera *Methanoplanus* and *Methanolacinia*. *Stand Genomic Sci.* 2014;9: 1076. doi:10.4056/sigs.5138968
