# Supplementary material for: Wide range of metabolic adaptations to the acquisition of the Calvin cycle revealed by comparison of microbial genomes
Source: PubMed Central journal article supplement (PMC7895386; doi:10.1371/journal.pcbi.1008742), 2021-02-08
Supplement: pcbi.1008742.s003.pdf [file pcbi.1008742.s003.pdf]

## S2 Table. Pfams associated with photosynthesis.

| Feature    | Name            | Description                                                     |
|------------|-----------------|-----------------------------------------------------------------|
| PF10643.9  | Cytochrome-c551 | Photosystem P840 reaction-centre cytochrome c-551               |
| PF02276.18 | CytoC_RC        | Photosynthetic reaction centre cytochrome C subunit             |
| PF11947.8  | DUF3464         | Photosynthesis affected mutant 68                               |
| PF01716.18 | MSP             | Manganese-stabilising protein / photosystem II polypeptide      |
| PF00124.19 | Photo_RC        | Photosynthetic reaction centre protein                          |
| PF03967.13 | PRCH            | Photosynthetic reaction centre, H-chain N-terminal region       |
| PF00223.19 | PsaA_PsaB       | Photosystem I psaA/psaB protein                                 |
| PF02605.15 | PsaL            | Photosystem I reaction centre subunit XI                        |
| PF07465.13 | PsaM            | Photosystem I protein M (PsaM)                                  |
| PF05479.11 | PsaN            | Photosystem I reaction centre subunit N (PSAN or PSI-N)         |
| PF00737.20 | PsbH            | Photosystem II 10 kDa phosphoprotein                            |
| PF02532.14 | PsbI            | Photosystem II reaction centre I protein (PSII 4.8 kDa protein) |
| PF02533.15 | PsbK            | Photosystem II 4 kDa reaction centre component                  |
| PF05151.12 | PsbM            | Photosystem II reaction centre M protein (PsbM)                 |
| PF02468.15 | PsbN            | Photosystem II reaction centre N protein (psbN)                 |
| PF04725.12 | PsbR            | Photosystem II 10 kDa polypeptide PsbR                          |
| PF01405.17 | PsbT            | Photosystem II reaction centre T protein                        |
| PF06514.11 | PsbU            | Photosystem II 12 kDa extrinsic protein (PsbU)                  |
| PF07123.12 | PsbW            | Photosystem II reaction centre W protein (PsbW)                 |
| PF06596.11 | PsbX            | Photosystem II reaction centre X protein (PsbX)                 |
| PF06298.11 | PsbY            | Photosystem II protein Y (PsbY)                                 |
| PF00421.19 | PSII            | Photosystem II protein                                          |
| PF14870.6  | PSII_BNR        | Photosynthesis system II assembly factor YCF48                  |
| PF13326.6  | PSII_Pbs27      | Photosystem II Pbs27                                            |
| PF18240.1  | PSII_Pbs31      | Photosystem II Psb31 protein                                    |
| PF05969.11 | PSII_Ycf12      | Photosystem II complex subunit Ycf12                            |
| PF00796.18 | PSI_8           | Photosystem I reaction centre subunit VIII                      |
| PF02427.17 | PSI_PsaE        | Photosystem I reaction centre subunit IV / PsaE                 |
| PF02507.15 | PSI_PsaF        | Photosystem I reaction centre subunit III                       |
| PF03244.14 | PSI_PsaH        | Photosystem I reaction centre subunit VI                        |
| PF01701.18 | PSI_PsaJ        | Photosystem I reaction centre subunit IX / PsaJ                 |
| PF01241.18 | PSI_PSAK        | Photosystem I psaG / psaK                                       |
| PF10657.9  | RC-P840_PscD    | Photosystem P840 reaction centre protein PscD                   |

The table lists all Pfams that match the search terms "photosynthesis", "photosynthetic", or "photosystem". The columns contain Pfam feature ID ('Feature'), feature name ('Name'), and feature description ('Description'; the DESC line from the Pfam HMM database). Given the occurrence of three of these Pfams in the photosynthetic organism *Bradyrhizobium* sp. ORS 278, photosynthesis capability was assigned to organisms with at least three of these Pfams.
